# Supplementary material
Source: publisher figshare collection journal article supplement (https://acs.figshare.com/ndownloader/files/12718235)
Supplement: Supplementary file 1 [file 12718235]

### **Electronic Supplementary Information**

#### **Genesis of Neuroprotective Peptoid from A $\beta$ 30-34 Inhibits A $\beta$ Aggregation and AChE**

##### **Activity**

Krishnangsu Pradhan,<sup>1</sup> Gaurav Das,<sup>1,2</sup> Prasenjit Mondal,<sup>1,2</sup> Juhee Khan,<sup>1,2</sup> Surajit Barman<sup>1</sup>

Surajit Ghosh<sup>1,2\*</sup>

1. Organic & Medicinal Chemistry Division, CSIR-Indian Institute of Chemical Biology, 4, Raja S. C. Mullick Road, Jadavpur, Kolkata-700032, West Bengal, India. Fax: +91-33-2473-5197/0284; Tel: +91-33-2499-5872
2. Academy of Scientific and Innovative Research (AcSIR), CSIR-Indian Institute of Chemical Biology Campus, 4 Raja S. C. Mullick Road, Kolkata 700032, India.

Correspondence author: [sgosh@iicb.res.in](mailto:sgosh@iicb.res.in)

## **Supplementary Figures**

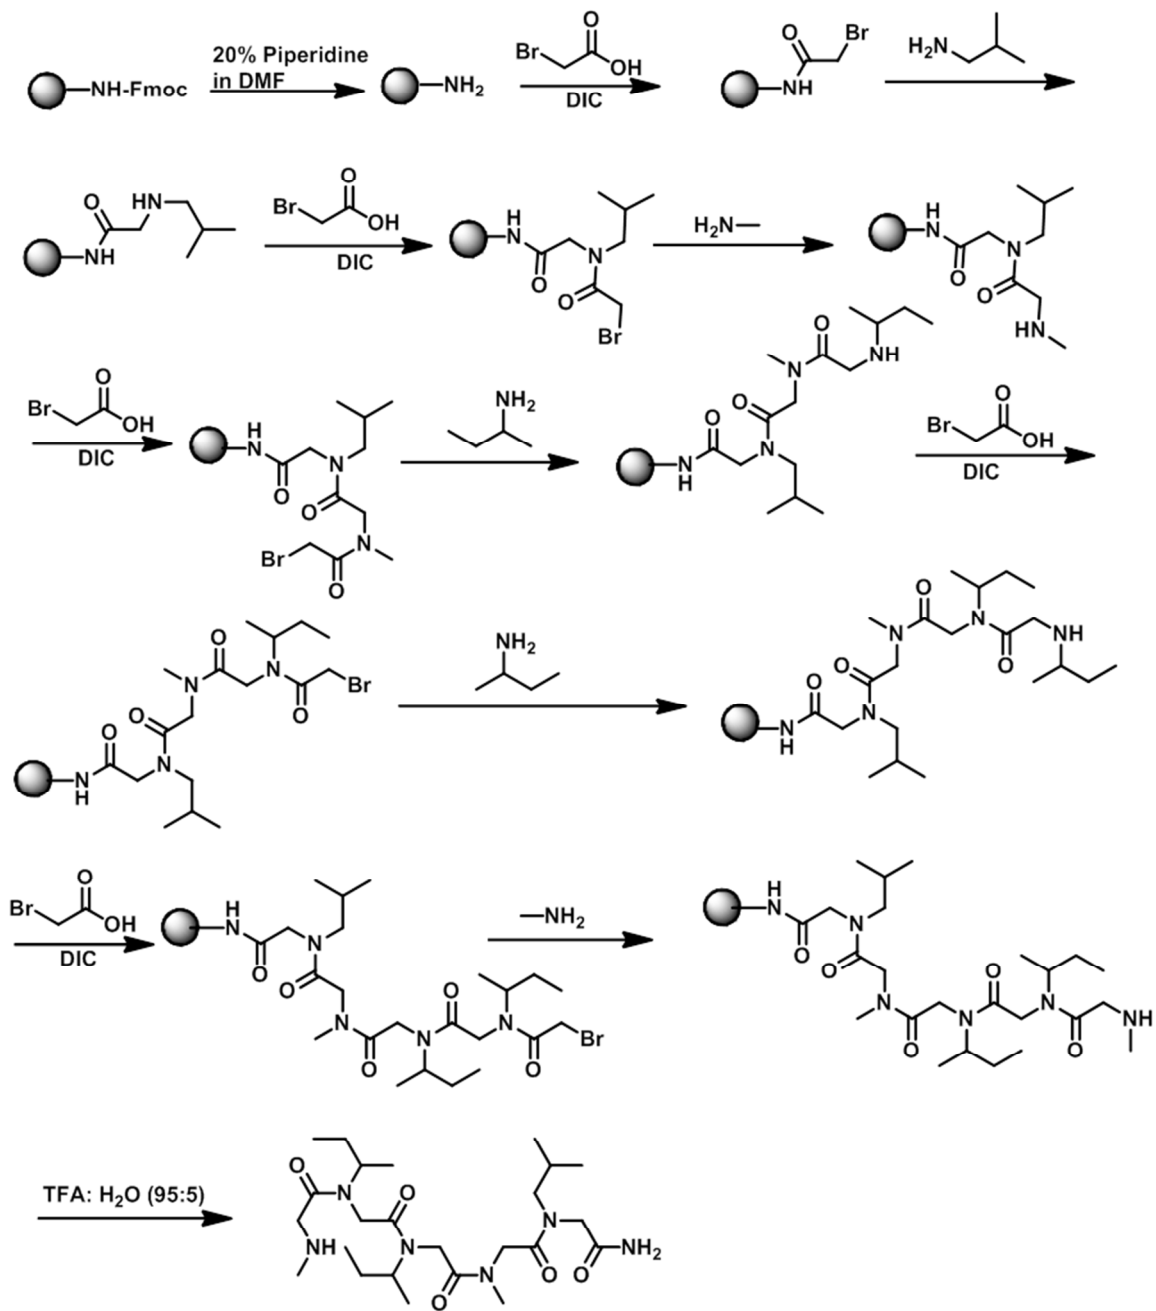

**Figure S1.** Synthetic scheme for preparation of AIIAL peptoid by solid phase method.

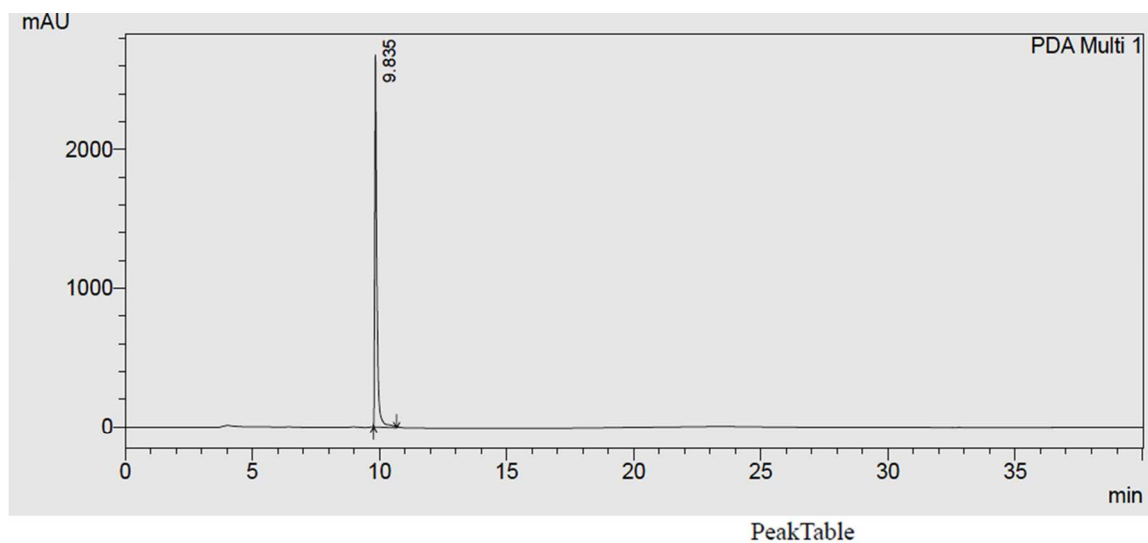

**Figure S2.** HPLC chromatogram of AI peptoid.

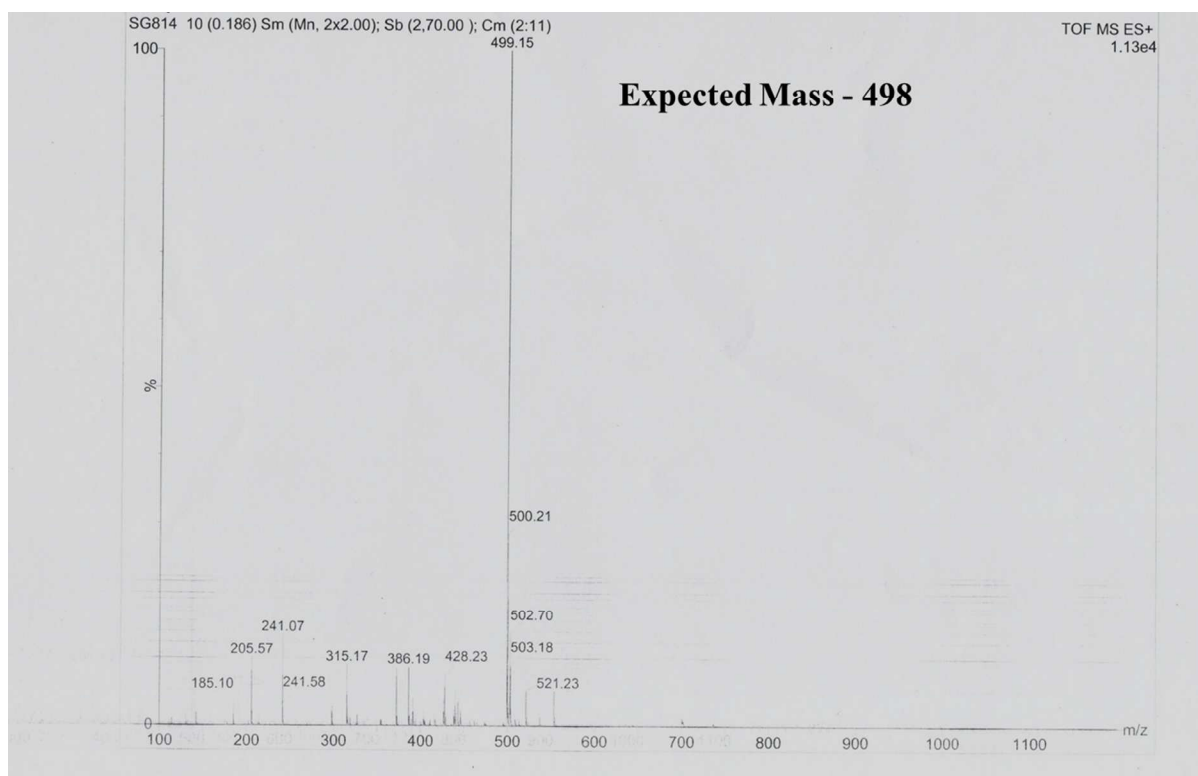

**Figure S3.** MASS data of AI peptoid shows 499 ( $498 + H^+$ ) Da.

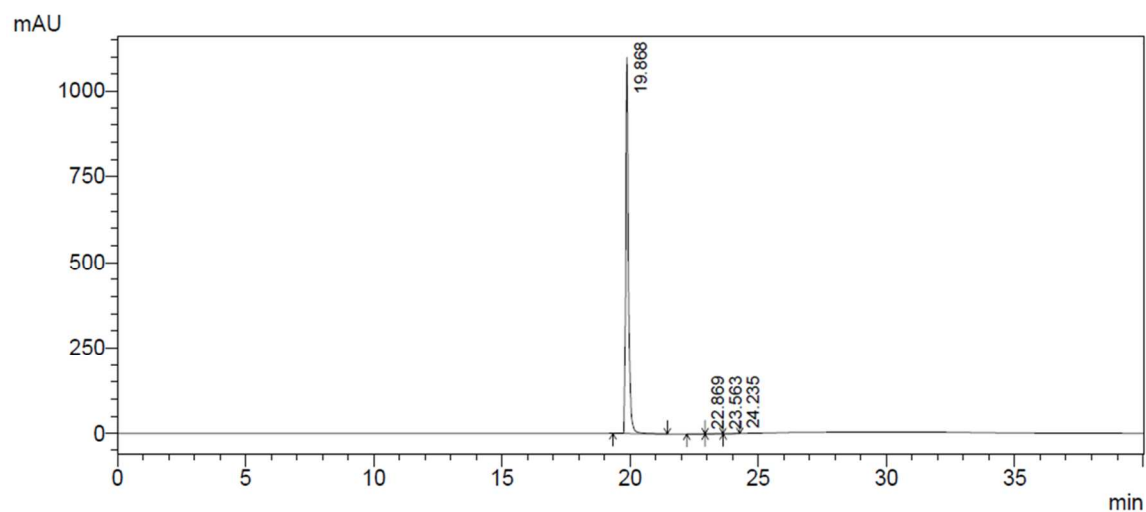

PeakTable

| PDA Ch1 210nm 4nm |           |          |         |         |          |
|-------------------|-----------|----------|---------|---------|----------|
| Peak#             | Ret. Time | Area     | Height  | Area %  | Height % |
| 1                 | 19.893    | 33972675 | 4004353 | 100.000 | 100.000  |
| Total             |           | 33972675 | 4004353 | 100.000 | 100.000  |

**Figure S4.** HPLC chromatogram of 5(6)-Carboxyfluorescein attached AI peptoid.

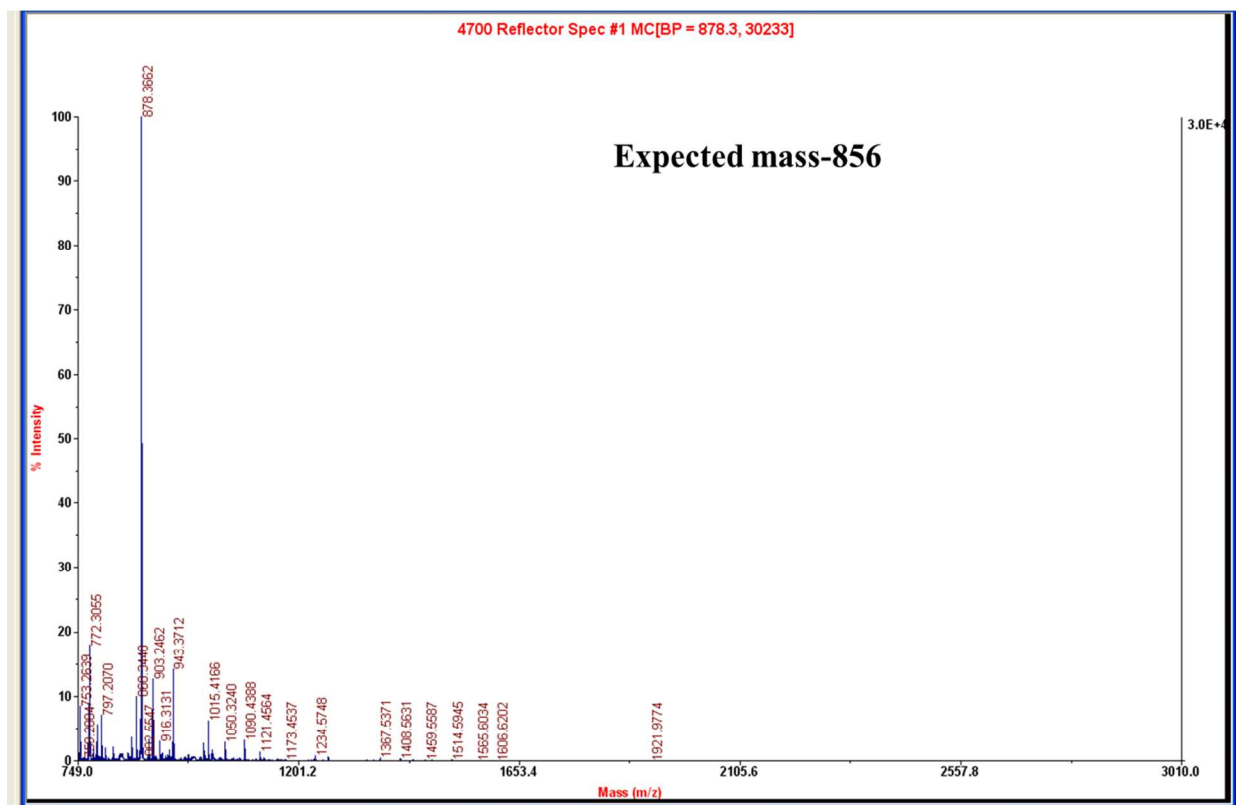

**Figure S5.** MASS data of 5(6)-Carboxyfluorescein attached AI peptoid.

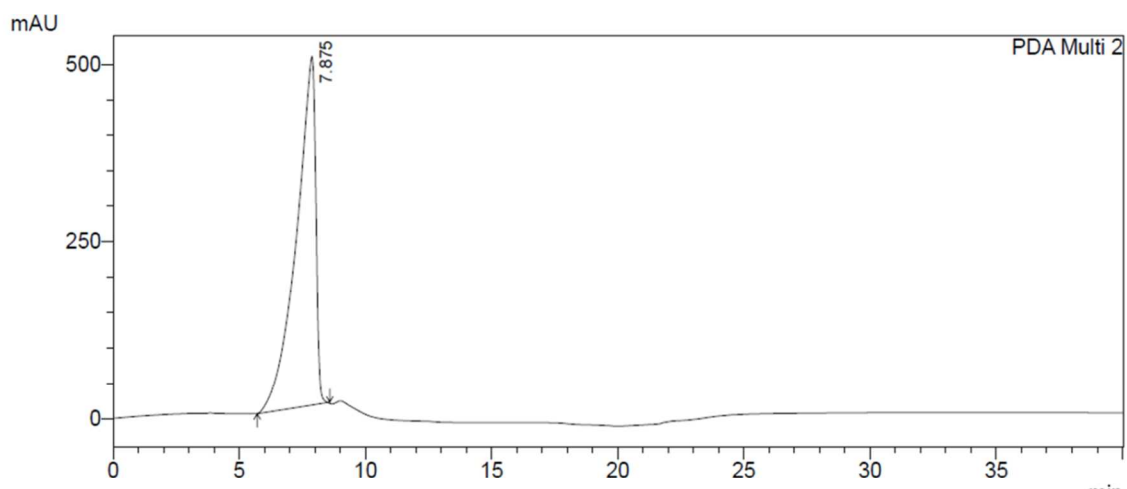

PeakTable

| PDA Ch2 260nm 4nm |           |          |        |         |          |
|-------------------|-----------|----------|--------|---------|----------|
| Peak#             | Ret. Time | Area     | Height | Area %  | Height % |
| 1                 | 7.875     | 26090686 | 492451 | 100.000 | 100.000  |
| Total             |           | 26090686 | 492451 | 100.000 | 100.000  |

**Figure S6.** HPLC chromatogram of AI peptide.

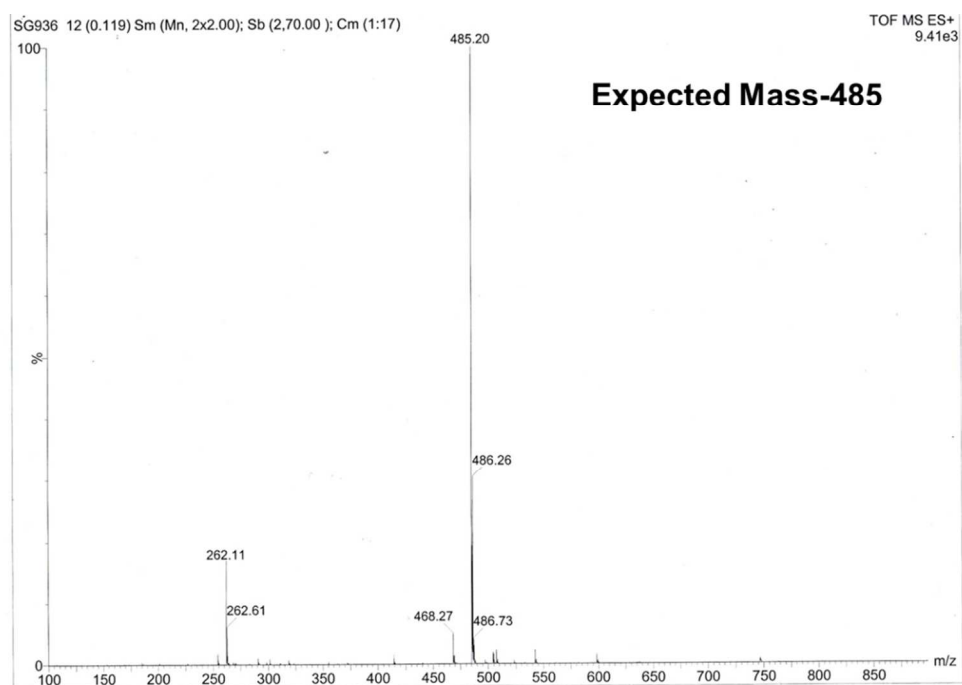

**Figure S7.** MASS data of AI peptide shows 485 Da.

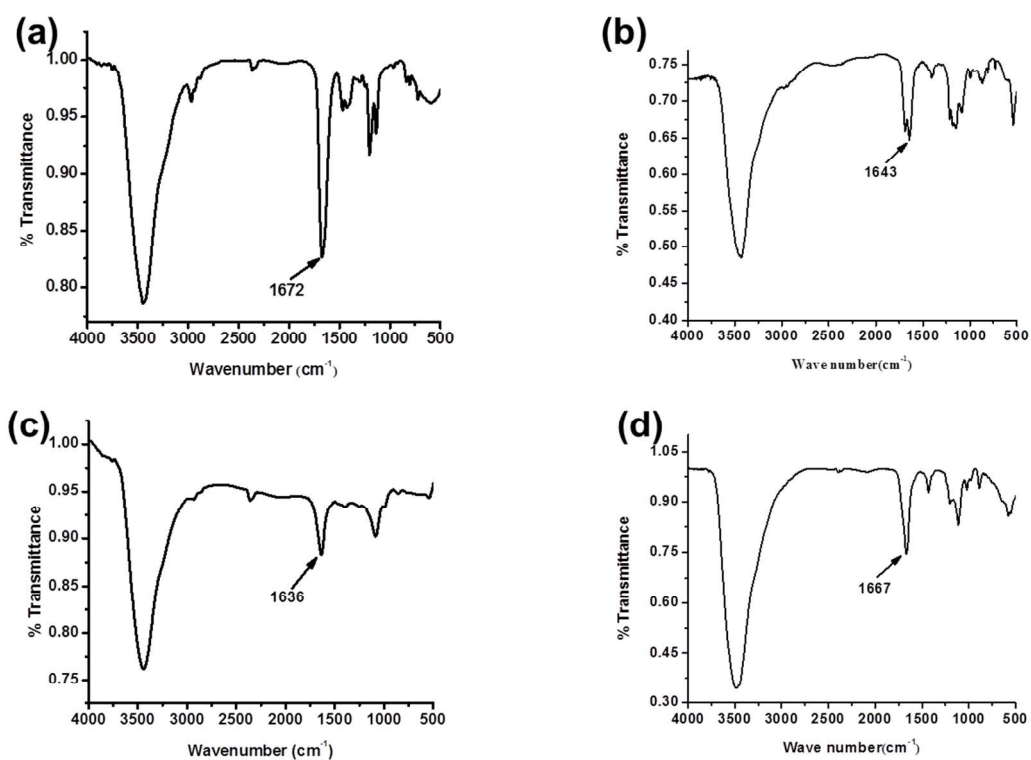

**Figure S8.** FT-IR spectrums reveal that AI peptoid inhibits fibril formation of A $\beta$ 42 (a) AI peptoid at 0 day incubation, (b) AI peptoid after 7 days incubation, (c) A $\beta$  peptide after 7 days incubation and (d) A $\beta$  peptide with AI peptoid after 7 days incubation.

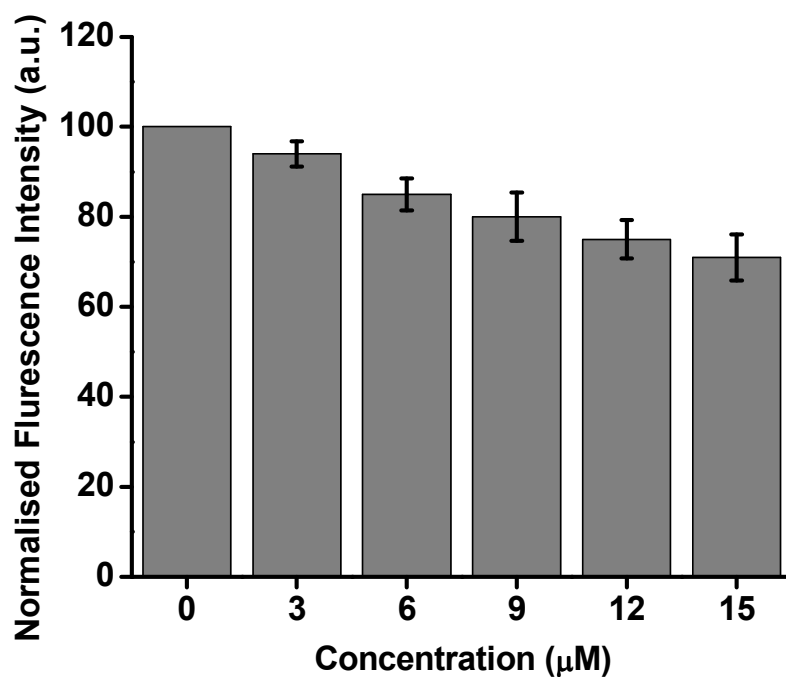

**Figure S9.** ThT assay with AI peptide for amyloid fibril inhibition.

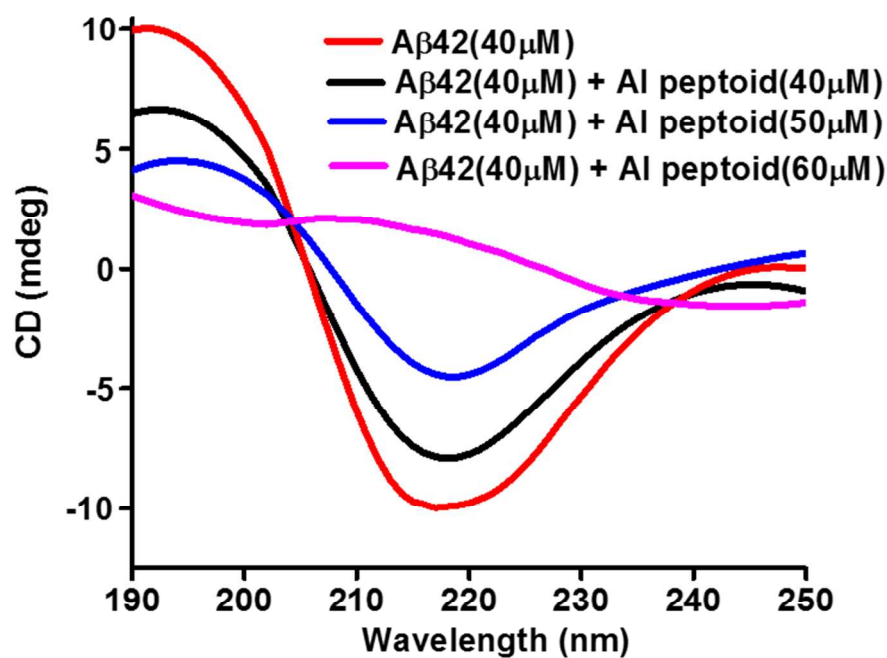

**Figure S10.** CD spectra of Aβ42 peptide without and with AI peptoid in different concentrations showing inhibition of β-sheet structure.

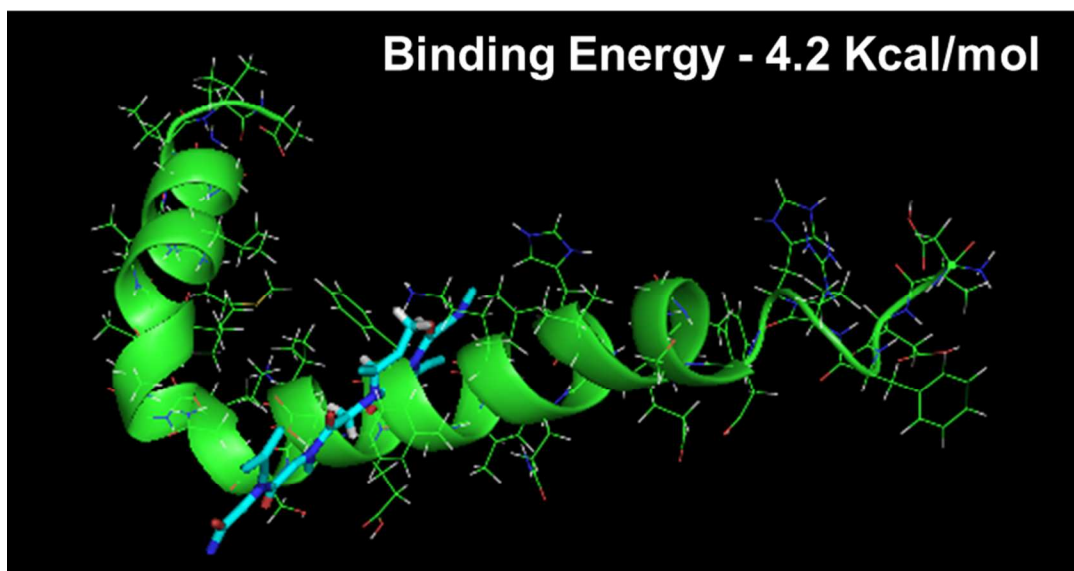

**Figure S11.** Docking study reveals that AI peptoid binds to the hydrophobic region (Aβ17-21) of Aβ peptide.

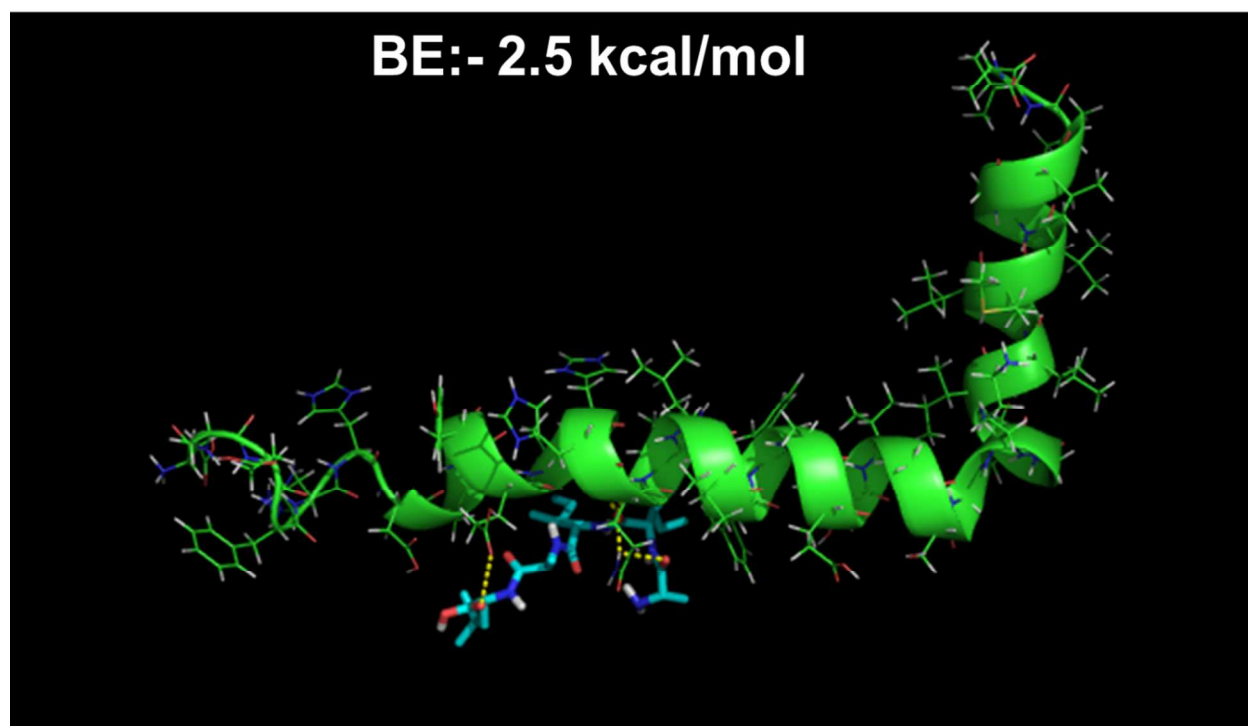

**Figure S12.** Docking study reveals that AI peptide binds to the A $\beta$ 11-16 of A $\beta$  peptide.



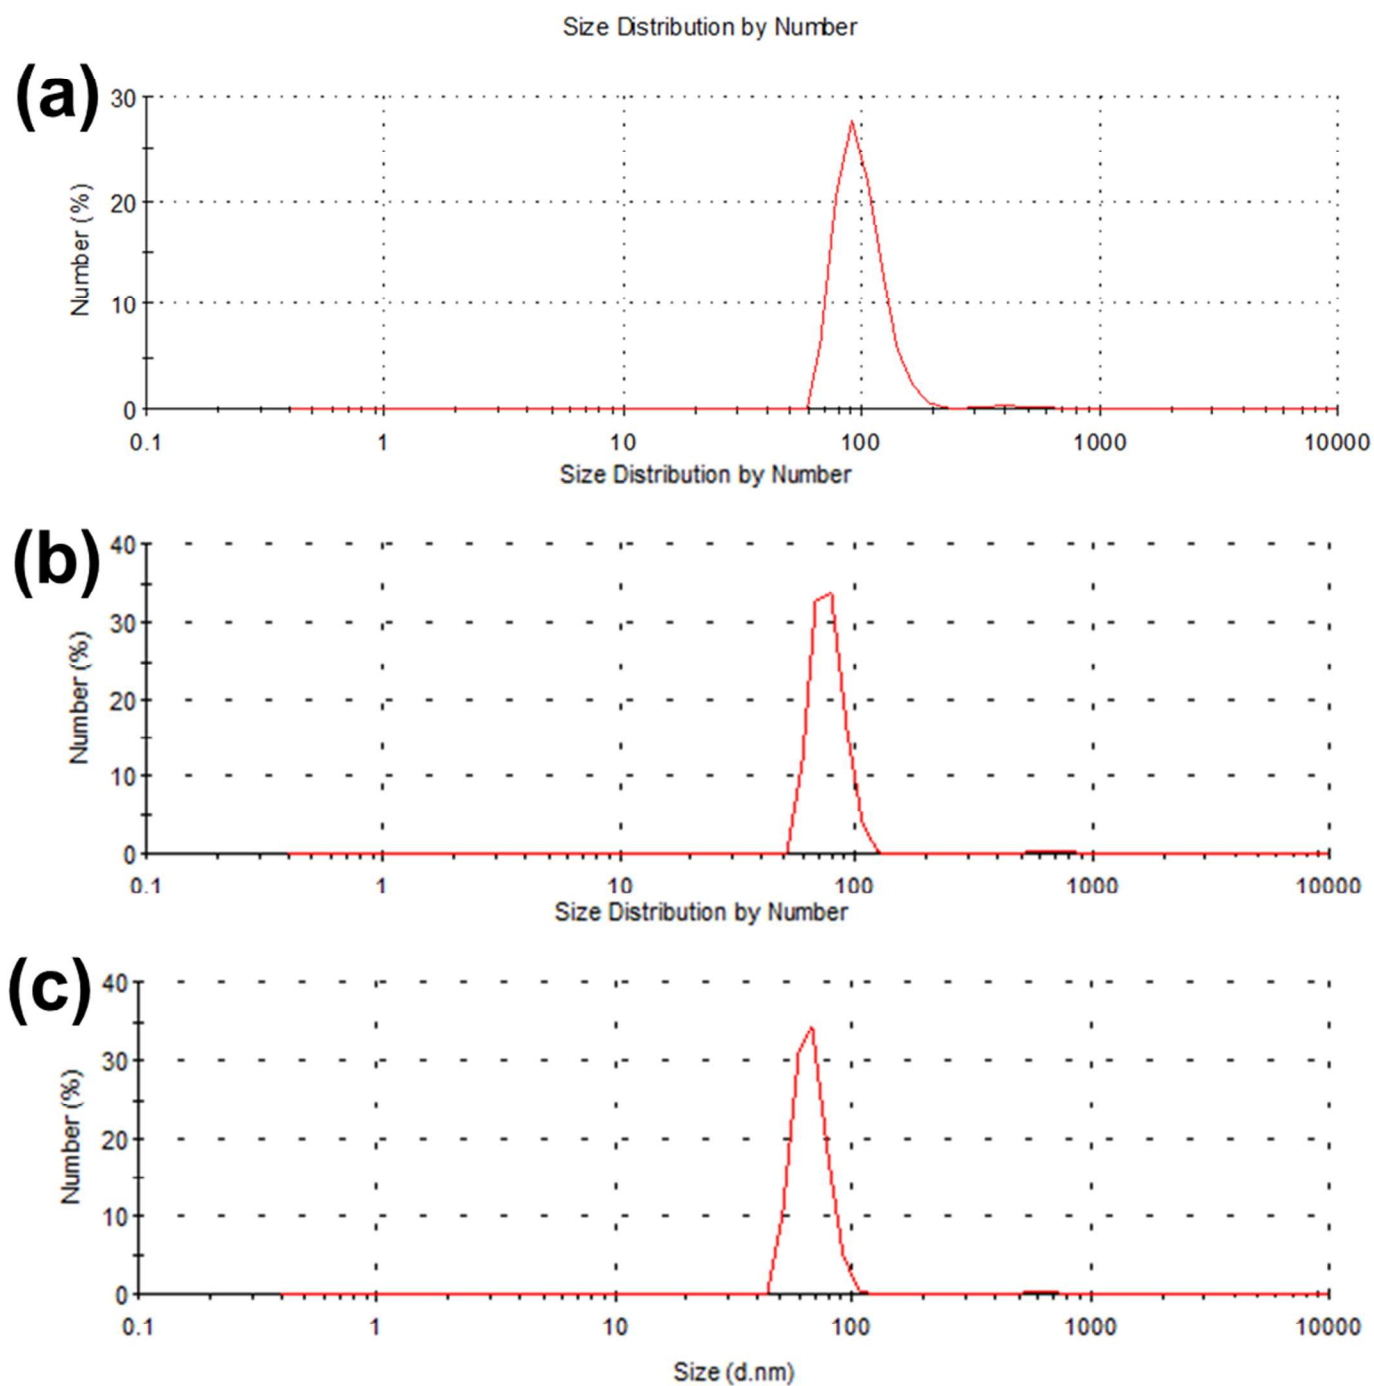

**Figure S13.** DLS study of AI peptoid (a) at 0 day incubation (b) at 2 days incubation and (c) at 5 days incubation.

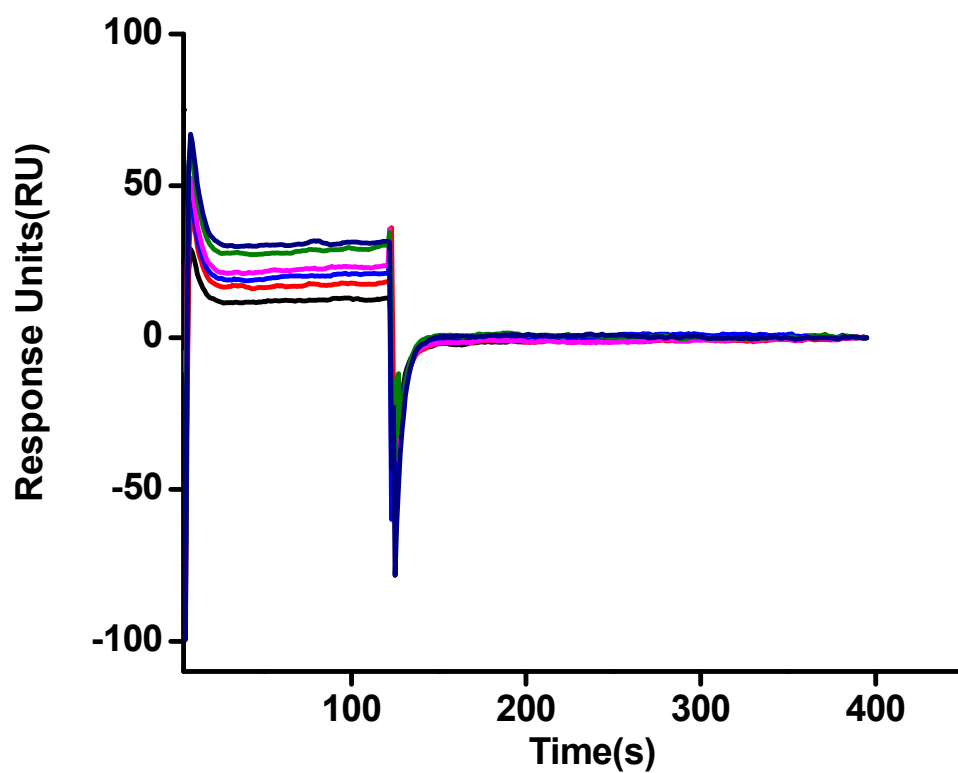

**Figure S14.** SPR sensogram for the kinetic analysis of the binding of AI peptide with tubulin on a NTA biosensor chip using a Biacore 3000 instrument.

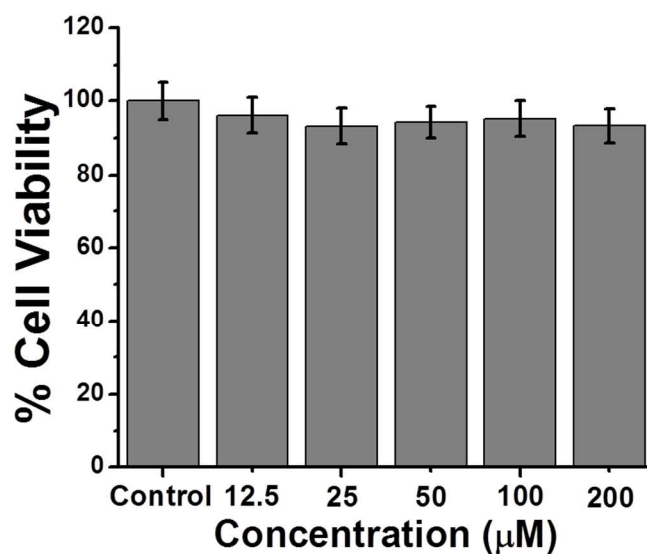

**Figure S15.** MTT assay of the AI peptoid treated PC12 cells showing no effect on cell viability.

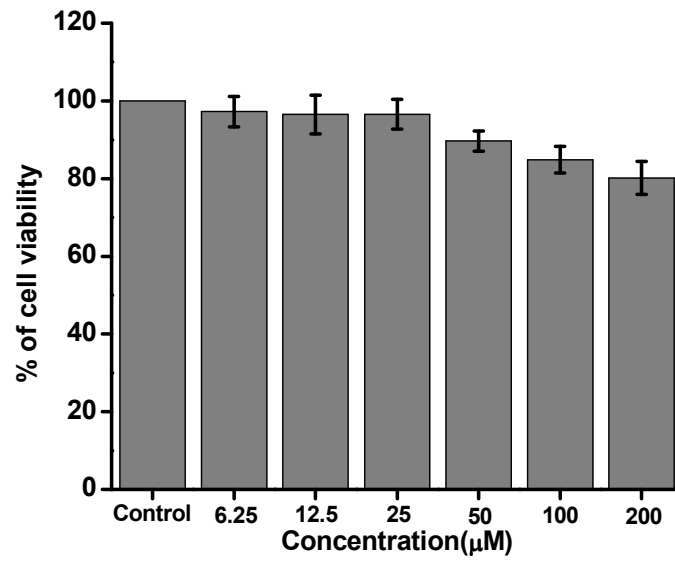

**Figure S16.** MTT assay of the AI peptide in the PC12 cells showing around 10% toxicity.

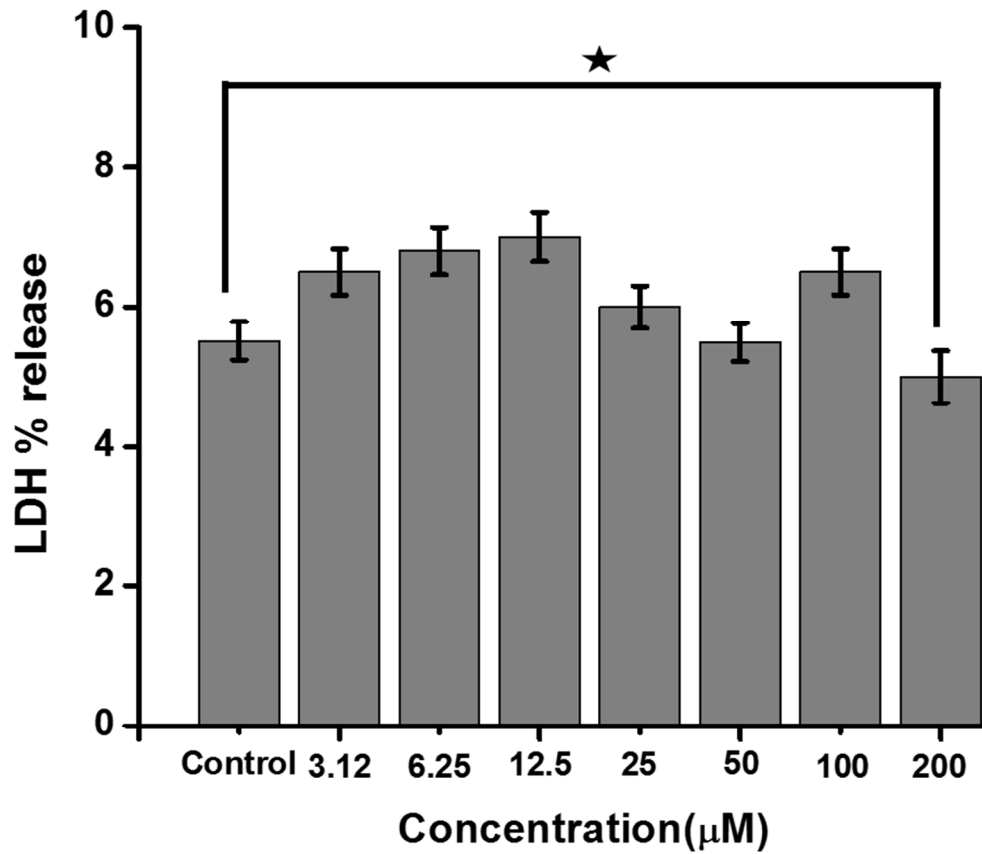

**Figure S17.** LDH assay reveals no cytotoxic effect of AI peptoid on treated PC12 cells.

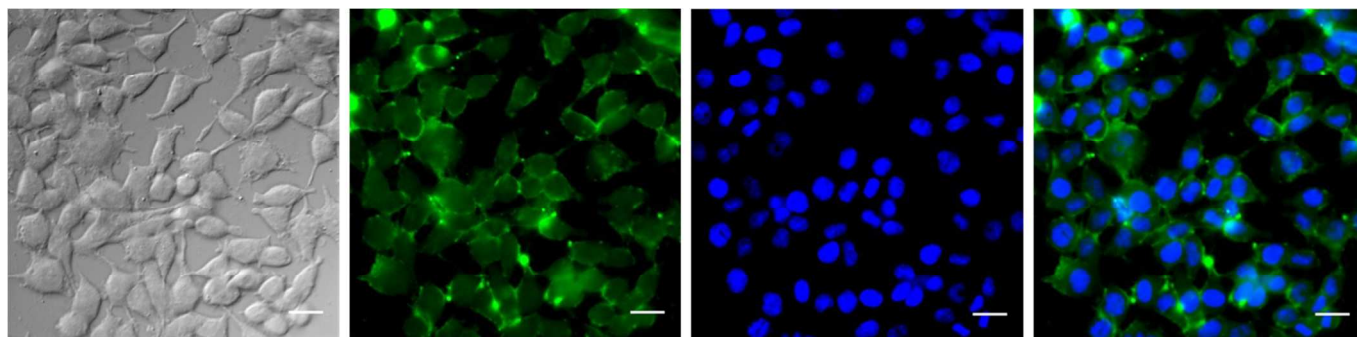

**Figure S18.** Cellular uptake of 5(6)-Carboxyfluorescein attached AI peptoid into the PC12 derived neurons.

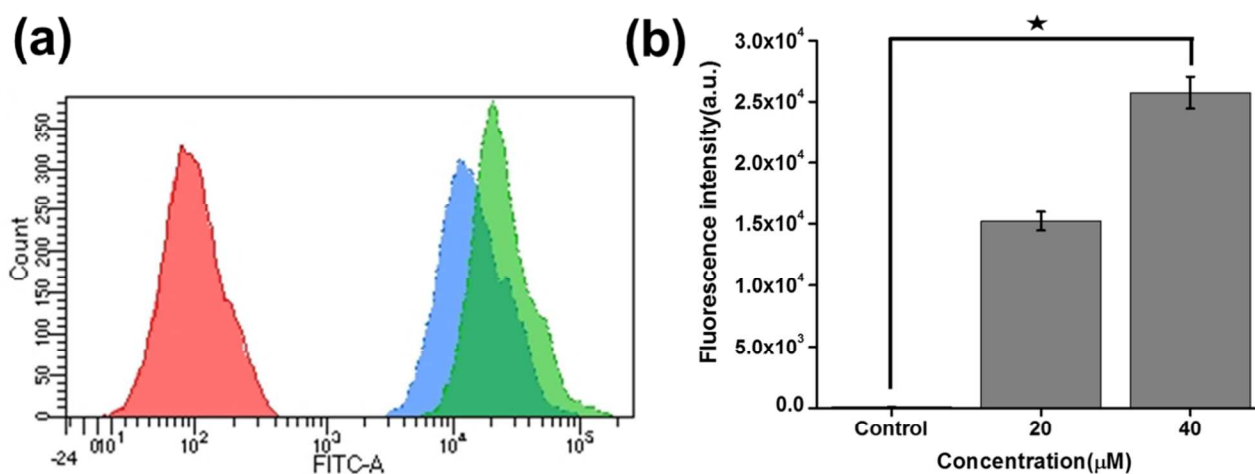

**Figure S19.** (a) Cellular uptake of 5(6)-Carboxyfluorescein attached AI peptoid into the PC12 cells at 20  $\mu$ M and 40  $\mu$ M concentrations was monitored using FACS. Graph reveals increasing trend of cellular uptake upon increasing the AI peptoid concentrations. (b) Bar diagram represents quantitative cellular uptake of 5(6)-Carboxyfluorescein attached AI peptoid.

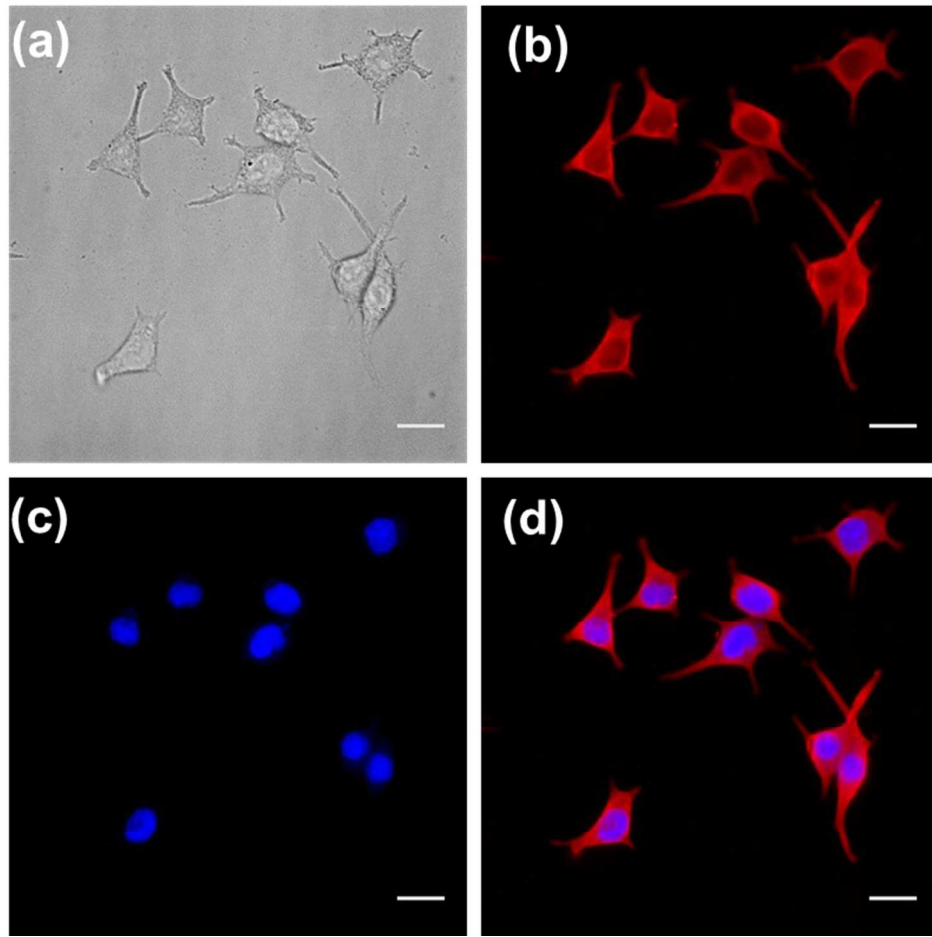

**Figure S20.** Microscopic images of PC12 derived neurons (control) for neurite outgrowth (a) DIC mode (b) TRITC channel (c) DAPI channel and (d) merged channel.

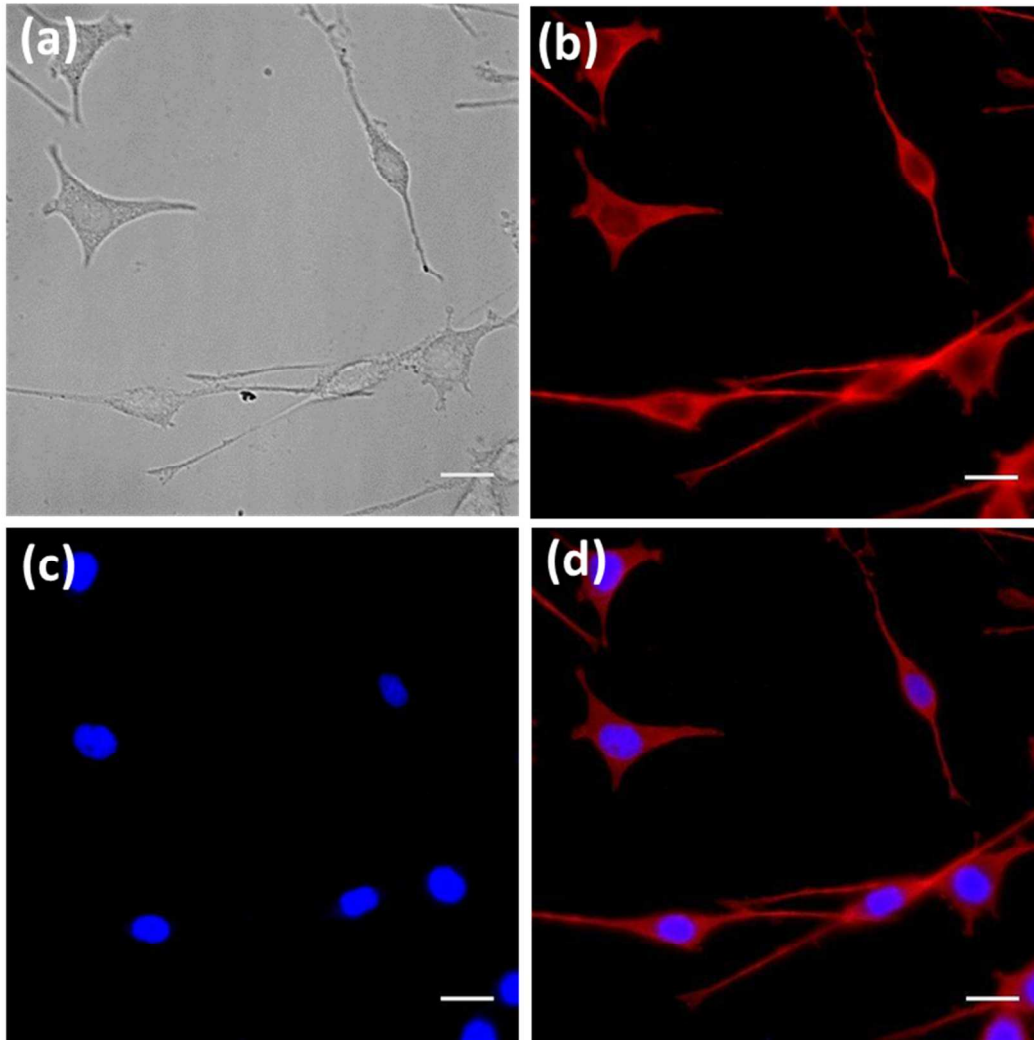

**Figure S21.** Microscopic images of PC12 derived neurons upon treatment with AI peptoid showing healthy microtubule networks and significant neurite outgrowth compared to the control (a) DIC channel (b) TRITC channel (c) DAPI channel and (d) merged channel.

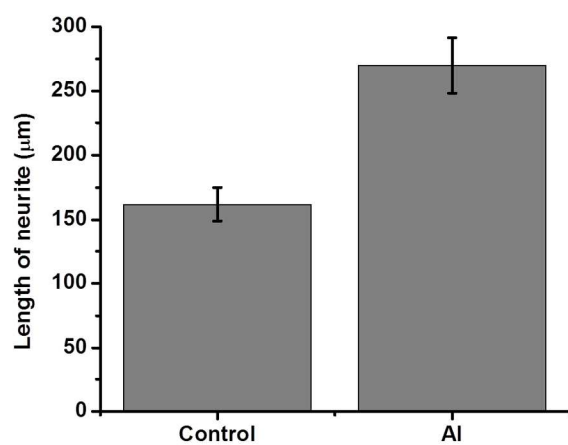

**Figure S22.** Quantitative analysis of neurite outgrowth of PC12 derived neurons upon treatment with AI peptoid.

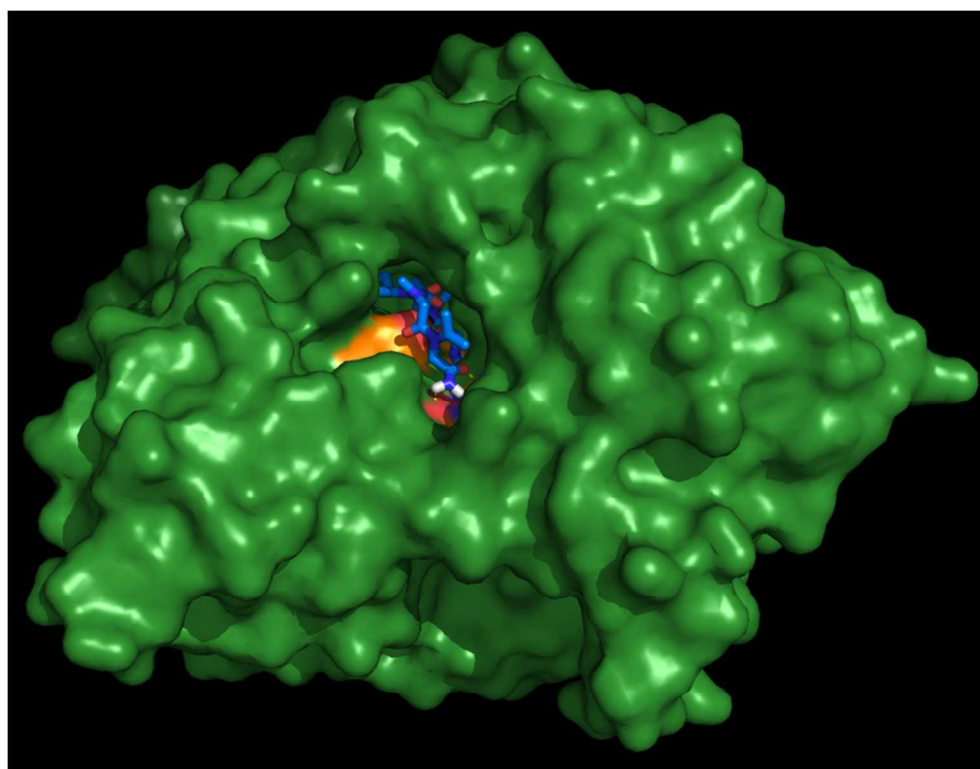

**Figure S23.** Docking study of AI peptoid with AChE reveals that AI peptoid binds with CAS and PAS site of AChE.

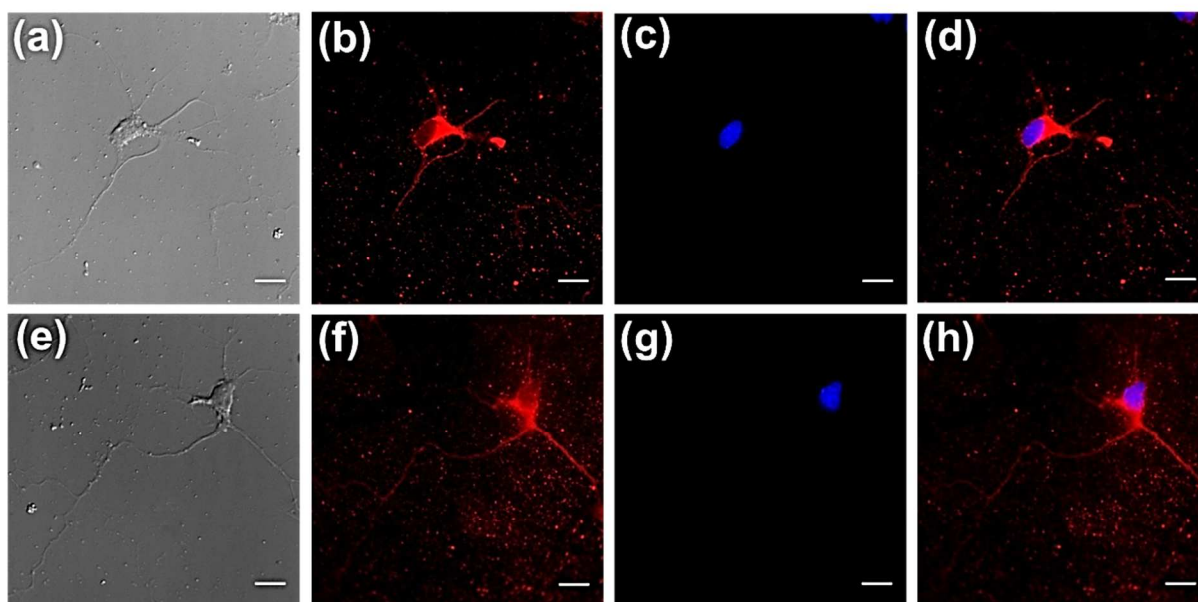

**Figure S24.** Microscopic images of primary cortical neurons without AI (a-d) peptoid and with AI peptoid treatment (e-h) showing healthy microtubule networks and significant neurite outgrowth compared to the control. (a,e) DIC channel (b,f) TRITC channel (c,g) DAPI channel and (d,h) merged channel.

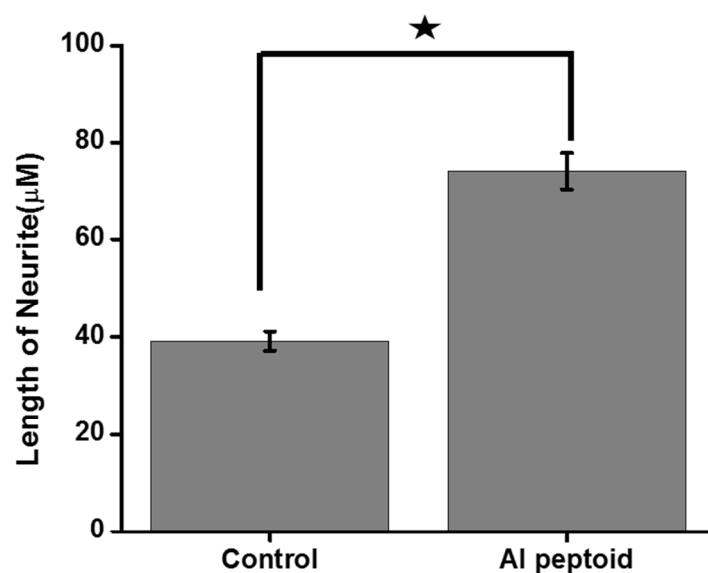

**Figure S25.** Quantitative analysis of neurite outgrowth of Primary cortical neurons upon treatment with AI peptoid.
